# Supplementary material for: Fluorescence and excited state dynamics of the deprotonated Schiff base retinal in proteorhodopsin
Source: publisher site journal article supplement (doi:10.1515/hsz-2015-0108), 2015-06-17
Supplement: Supplementary file 1 [file hsz-2015-0108_Supple.docx]

#

# Supplementary Material

**Figure legends**

**Figure S1** Black line: absorption spectrum of PR at pH 12 (freshly prepared). Green line: Absorption spectrum of degraded PR recorded two hours after the titration. Red line: Back titration to pH 5 leads to a red shift of the absorption maximum to 450 nm, which cannot be originated from the intact PR with pSB retinal.

**Figure S2** Excitation wavelength-dependent fluorescence spectrum of PR at pH 9 shows two maxima, implying a mixture of two different species, intact PR with dSB retinal and degraded PR.
